# Supplementary material for: Prevalence of Hepatitis B Vaccination Coverage and Serologic Evidence of Immunity Among US-Born Children and Adolescents From 1999 to 2016
Source: PubMed Central journal article supplement (PMC7658733; doi:10.1001/jamanetworkopen.2020.22388), 2020-11-11
Supplement: jamanetwopen-e2022388-s001.pdf [file jamanetwopen-e2022388-s001.pdf]

## Supplemental Online Content

Le MH, Yeo YH, So S, Gane E, Cheung RC, Nguyen MH. Prevalence of hepatitis B vaccination coverage and serologic evidence of immunity among US-born children and adolescents from 1999 to 2016. *JAMA Netw Open*. 2020;3(11):e2022388. doi:10.1001/jamanetworkopen.2020.22388

**eTable 1.** Prevalence of complete hepatitis B vaccination in U.S.-born children and adolescents (2-18 years) through self-reported vaccination history (survey years: 1999-2016)

**eTable 2.** Prevalence of complete hepatitis B vaccination in foreign-born children and adolescents (2-18 years) through self-reported vaccination history (survey years: 1999-2016)

**eTable 3.** Prevalence of Hepatitis B vaccine-induced immunity by serology results in fully vaccinated U.S.-born children and adolescents age 2-18 years (survey years: 1999-2016)

**eTable 4.** Prevalence of complete hepatitis B vaccine-induced immunity by serology test in fully vaccinated foreign-born children and adolescents age 2-18 years (survey years: 1999-2016)

**eTable 5.** Prevalence of hepatitis B core antibody in U.S.-born children and adolescents age 2-18 years (survey years 1999-2016)

**eTable 6.** Predictors of hepatitis B immunity via serology tests in fully vaccinated U.S.-born children (2-18 years) from survey years 1999-2016

**eTable 7.** Age specific prevalence of complete vaccination through participant self-reported vaccination history, by birth year from 1988-2007

**eTable 8.** Predictors of hepatitis B vaccination through reported vaccine history in U.S.-born children and adolescents (2-18 years) from survey years 1999-2016

**eFigure 1.** Timeline of hepatitis B vaccine recommendations by the Advisory Committee on Immunization Practices

**eFigure 2.** Timeline of hepatitis B vaccine availability in the United States

**eAppendix.** Literature review on anamnestic response

**eReferences**

This supplemental material has been provided by the authors to give readers additional information about their work.

**eTable 1: Prevalence of complete hepatitis B vaccination in U.S.-born children and adolescents (2-18 years) through self-reported vaccination history (survey years: 1999-2016)**

|                           | 1999-2004 |                         | 2005-2010 |                         | 2011-2016 |                         | Trends Analysis  |
|---------------------------|-----------|-------------------------|-----------|-------------------------|-----------|-------------------------|------------------|
| Demographic Variables     | n         | Adjusted % (95% CI)     | n         | Adjusted % (95% CI)     | n         | Adjusted % (95% CI)     | P-value          |
| <b>Overall</b>            | 8158      | <b>74.5</b> (72.0-76.9) | 7128      | <b>89.3</b> (87.8-90.5) | 6587      | <b>87.4</b> (85.9-88.8) | <b>&lt;0.001</b> |
| <b>Sex</b>                |           |                         |           |                         |           |                         |                  |
| Male                      | 4097      | <b>75.8</b> (72.7-78.7) | 3657      | <b>88.7</b> (86.9-90.3) | 3376      | <b>87.6</b> (85.9-89.2) | <b>&lt;0.001</b> |
| Female                    | 4061      | <b>73.2</b> (70.8-75.4) | 3471      | <b>89.8</b> (88.0-91.4) | 3211      | <b>87.2</b> (85.2-89.0) | <b>&lt;0.001</b> |
| <b>Age groups (years)</b> |           |                         |           |                         |           |                         |                  |
| 2-5                       | 1288      | <b>83.5</b> (80.6-86.1) | 1561      | <b>88.1</b> (85.6-90.1) | 1493      | <b>86.8</b> (84.6-88.8) | 0.073            |
| 6-10                      | 1931      | <b>81.1</b> (78.4-83.5) | 2069      | <b>92.1</b> (90.0-93.9) | 2201      | <b>90.8</b> (89.0-92.4) | <b>&lt;0.001</b> |
| 11-13                     | 1816      | <b>71.3</b> (68.1-74.4) | 1313      | <b>90.9</b> (88.4-92.9) | 1194      | <b>87.5</b> (84.8-89.8) | <b>&lt;0.001</b> |
| 14-18                     | 3123      | <b>65.8</b> (61.2-70.2) | 2185      | <b>86.6</b> (84.3-88.6) | 1699      | <b>84.7</b> (81.8-87.2) | <b>&lt;0.001</b> |
| <b>Race/Ethnicity</b>     |           |                         |           |                         |           |                         |                  |
| Non-Hispanic White        | 2330      | <b>74.3</b> (70.7-77.6) | 2239      | <b>88.7</b> (86.5-90.6) | 1773      | <b>87.5</b> (85.3-89.4) | <b>&lt;0.001</b> |
| Non-Hispanic Black        | 2805      | <b>72.3</b> (68.9-75.4) | 1945      | <b>87.0</b> (83.8-89.6) | 1787      | <b>85.5</b> (81.2-89.0) | <b>&lt;0.001</b> |
| Mexican American          | 2423      | <b>76.1</b> (71.9-79.9) | 1955      | <b>91.5</b> (89.5-93.2) | 1419      | <b>88.2</b> (85.8-90.3) | <b>&lt;0.001</b> |
| Hispanic                  | 296       | <b>82.2</b> (75.6-87.3) | 594       | <b>93.3</b> (89.8-95.6) | 722       | <b>86.7</b> (83.2-89.5) | <b>0.268</b>     |
| Non-Hispanic Asian        | 0         |                         | 0         |                         | 451       | <b>87.9</b> (83.5-91.3) |                  |

|                                          |      |                         |      |                         |      |                         |                  |
|------------------------------------------|------|-------------------------|------|-------------------------|------|-------------------------|------------------|
| Other-Multiracial                        | 304  | <b>73.1</b> (63.3-81.0) | 395  | <b>91.5</b> (86.8-94.6) | 435  | <b>90.2</b> (85.8-93.4) | <b>&lt;0.001</b> |
| <b>Education Level (Age ≥6)</b>          |      |                         |      |                         |      |                         |                  |
| ≤Elementary School                       | 2624 | <b>77.1</b> (74.7-79.3) | 2643 | <b>92.4</b> (90.6-93.9) | 2737 | <b>89.7</b> (87.7-91.3) | <b>&lt;0.001</b> |
| Middle School                            | 2086 | <b>75.4</b> (71.6-78.7) | 1336 | <b>88.6</b> (85.9-90.9) | 1159 | <b>87.7</b> (85.1-90.0) | <b>&lt;0.001</b> |
| ≥ High School                            | 2156 | <b>62.9</b> (58.0-67.6) | 1587 | <b>86.0</b> (83.4-88.3) | 1195 | <b>84.1</b> (80.7-87.0) | <b>&lt;0.001</b> |
| <b>Insurance Status</b>                  |      |                         |      |                         |      |                         |                  |
| Insured                                  | 6935 | <b>75.7</b> (73.1-78.2) | 6358 | <b>90.1</b> (88.7-91.3) | 6149 | <b>88.0</b> (86.5-89.4) | <b>&lt;0.001</b> |
| Uninsured                                | 1116 | <b>64.7</b> (58.9-70.1) | 751  | <b>81.6</b> (76.6-85.7) | 430  | <b>79.0</b> (72.4-84.3) | <b>&lt;0.001</b> |
| <b>Household Size</b>                    |      |                         |      |                         |      |                         |                  |
| 1-2                                      | 454  | <b>67.3</b> (59.3-74.3) | 356  | <b>82.9</b> (77.9-87.0) | 251  | <b>88.0</b> (81.0-92.6) | <b>&lt;0.001</b> |
| 3-5                                      | 5495 | <b>76.0</b> (73.4-78.4) | 4852 | <b>89.8</b> (88.5-91.0) | 4348 | <b>87.9</b> (85.7-89.7) | <b>&lt;0.001</b> |
| 6+                                       | 2209 | <b>71.1</b> (65.1-76.4) | 1920 | <b>88.7</b> (84.5-91.8) | 1988 | <b>86.1</b> (83.4-88.5) | <b>&lt;0.001</b> |
| <b>Family poverty income ratio (PIR)</b> |      |                         |      |                         |      |                         |                  |
| <1                                       | 2466 | <b>72.8</b> (69.3-76.0) | 2099 | <b>88.6</b> (86.0-90.7) | 2109 | <b>86.0</b> (83.3-88.3) | <b>&lt;0.001</b> |
| ≥1                                       | 5163 | <b>75.8</b> (73.3-78.2) | 4650 | <b>89.6</b> (87.9-91.1) | 4034 | <b>88.2</b> (86.4-89.7) | <b>&lt;0.001</b> |

**eTable 2: Prevalence of complete hepatitis B vaccination in foreign-born children and adolescents (2-18 years) through self-reported vaccination history (survey years: 1999-2016)**

|                           | 1999-2004 |                     | 2005-2010 |                     | 2011-2016 |                     | Trends Analysis |
|---------------------------|-----------|---------------------|-----------|---------------------|-----------|---------------------|-----------------|
| Demographic Variables     | n         | Adjusted % (95% CI) | n         | Adjusted % (95% CI) | n         | Adjusted % (95% CI) | P-value         |
| Overall                   | 954       | 67.4 (61.9-72.5)    | 661       | 89.0 (85.1-92.0)    | 554       | 85.4 (82.0-88.3)    | <0.001          |
| <b>Sex</b>                |           |                     |           |                     |           |                     |                 |
| Male                      | 506       | 65.1 (57.4-72.1)    | 328       | 87.1 (81.7-91.1)    | 270       | 87.2 (82.2-91.0)    | <0.001          |
| Female                    | 448       | 69.9 (63.7-75.5)    | 333       | 90.9 (86.1-94.1)    | 284       | 83.6 (77.8-88.1)    | 0.001           |
| <b>Age groups (years)</b> |           |                     |           |                     |           |                     |                 |
| 2-5                       | 49        | 71.2 (53.2-84.4)    | 42        | 92.9 (78.6-97.9)    | 50        | 91.9 (81.4-96.7)    | 0.019           |
| 6-10                      | 152       | 78.9 (69.8-85.9)    | 155       | 90.7 (81.7-95.5)    | 123       | 88.7 (81.0-93.5)    | 0.042           |
| 11-13                     | 195       | 67.2 (57.3-75.8)    | 137       | 90.5 (80.6-95.6)    | 110       | 84.4 (74.3-91.0)    | 0.008           |
| 14-18                     | 558       | 61.1 (53.4-68.2)    | 327       | 86.8 (80.3-91.4)    | 271       | 83.5 (79.0-87.2)    | <0.001          |
| <b>Race/Ethnicity</b>     |           |                     |           |                     |           |                     |                 |
| Non-Hispanic White        | 66        | 73.7 (60.3-83.8)    | 62        | 95.2 (84.1-98.7)    | 22        | 92.4 (71.3-98.4)    | 0.035           |
| Non-Hispanic Black        | 109       | 68.6 (53.9-80.2)    | 55        | 91.9 (78.7-97.2)    | 59        | 83.2 (71.3-90.8)    | 0.085           |
| Mexican American          | 647       | 65.7 (59.3-71.5)    | 372       | 84.1 (79.2-88.0)    | 164       | 82.0 (73.8-88.1)    | 0.002           |
| Hispanic                  | 87        | 65.2 (50.5-77.5)    | 116       | 92.7 (83.7-96.9)    | 106       | 91.7 (83.6-96.0)    | <0.001          |
| Non-Hispanic Asian        | 0         |                     | 0         |                     | 182       | 81.7 (72.5-88.4)    |                 |

|                                          |     |                         |     |                         |     |                         |                  |
|------------------------------------------|-----|-------------------------|-----|-------------------------|-----|-------------------------|------------------|
| Other-Multiracial                        | 45  | <b>63.6</b> (41.4-81.2) | 56  | <b>85.4</b> (68.5-94.0) | 21  | <b>87.9</b> (64.7-96.6) | 0.056            |
| <b>Education Level (Age ≥6)</b>          |     |                         |     |                         |     |                         |                  |
| ≤Elementary School                       | 210 | <b>67.4</b> (61.9-72.5) | 218 | <b>89.0</b> (85.1-92.0) | 168 | <b>85.4</b> (82.0-88.3) | <b>&lt;0.001</b> |
| Middle School                            | 334 | <b>69.4</b> (61.1-76.6) | 182 | <b>88.0</b> (78.6-93.6) | 149 | <b>89.6</b> (81.1-94.5) | <b>&lt;0.001</b> |
| ≥ High School                            | 360 | <b>62.6</b> (52.6-71.5) | 219 | <b>86.4</b> (79.0-91.4) | 187 | <b>81.7</b> (75.4-86.7) | <b>0.001</b>     |
| <b>Insurance Status</b>                  |     |                         |     |                         |     |                         |                  |
| Insured                                  | 435 | <b>70.1</b> (61.8-77.2) | 342 | <b>91.0</b> (86.1-94.3) | 378 | <b>87.3</b> (83.8-90.1) | <b>&lt;0.001</b> |
| Uninsured                                | 511 | <b>64.2</b> (57.2-70.6) | 314 | <b>85.6</b> (79.4-90.1) | 175 | <b>81.7</b> (74.4-87.2) | <b>&lt;0.001</b> |
| <b>Household Size</b>                    |     |                         |     |                         |     |                         |                  |
| 1-2                                      | 26  | <b>52.9</b> (28.8-75.8) | 22  | <b>81.4</b> (54.3-94.2) | 12  | <b>72.9</b> (45.6-89.6) | 0.237            |
| 3-5                                      | 501 | <b>67.6</b> (58.3-75.7) | 373 | <b>90.2</b> (85.4-93.6) | 381 | <b>86.1</b> (81.8-89.6) | <b>&lt;0.001</b> |
| 6+                                       | 427 | <b>68.5</b> (60.0-75.9) | 266 | <b>87.5</b> (81.0-92.0) | 161 | <b>85.1</b> (78.6-89.8) | <b>0.001</b>     |
| <b>Family poverty income ratio (PIR)</b> |     |                         |     |                         |     |                         |                  |
| <1                                       | 435 | <b>69.6</b> (61.7-76.4) | 300 | <b>88.0</b> (82.7-91.9) | 203 | <b>83.8</b> (75.8-89.6) | <b>0.005</b>     |
| ≥1                                       | 423 | <b>66.6</b> (55.5-76.1) | 297 | <b>88.9</b> (83.4-92.7) | 281 | <b>85.7</b> (80.7-89.6) | <b>&lt;0.001</b> |

**eTable 3. Prevalence of Hepatitis B vaccine-induced immunity by serology results in fully vaccinated U.S.-born children and adolescents age 2-18 years (survey years: 1999-2016)**

|                           | 1999-2004 |                         | 2005-2010 |                         | 2011-2016 |                         | Trends Analysis  |
|---------------------------|-----------|-------------------------|-----------|-------------------------|-----------|-------------------------|------------------|
| Demographic Variables     | n         | Adjusted % (95% CI)     | n         | Adjusted % (95% CI)     | n         | Adjusted % (95% CI)     | P-value          |
| <b>Overall</b>            | 7589      | <b>57.2</b> (53.8-60.6) | 6940      | <b>53.3</b> (51.2-55.4) | 6415      | <b>35.9</b> (33.7-38.2) | <b>&lt;0.001</b> |
| <b>Sex</b>                |           |                         |           |                         |           |                         |                  |
| Male                      | 3815      | <b>55.9</b> (51.9-59.8) | 3554      | <b>52.3</b> (50.0-54.9) | 3288      | <b>35.9</b> (33.4-38.5) | <b>&lt;0.001</b> |
| Female                    | 3774      | <b>58.7</b> (54.9-62.3) | 3386      | <b>54.4</b> (51.5-57.2) | 3127      | <b>35.9</b> (33.0-39.0) | <b>&lt;0.001</b> |
| <b>Age groups (years)</b> |           |                         |           |                         |           |                         |                  |
| 2-5                       | 1175      | <b>57.2</b> (53.1-61.2) | 1468      | <b>61.7</b> (58.6-64.6) | 1408      | <b>65.9</b> (62.2-69.3) | <b>0.002</b>     |
| 6-10                      | 1856      | <b>53.1</b> (49.6-56.5) | 2043      | <b>41.9</b> (38.9-45.0) | 2162      | <b>40.4</b> (37.4-43.5) | <b>&lt;0.001</b> |
| 11-13                     | 1653      | <b>64.8</b> (59.8-69.5) | 1294      | <b>43.4</b> (39.7-47.2) | 1175      | <b>26.5</b> (22.9-30.5) | <b>&lt;0.001</b> |
| 14-18                     | 2905      | <b>56.8</b> (51.8-61.6) | 2135      | <b>64.0</b> (60.1-67.7) | 1670      | <b>21.2</b> (18.2-24.6) | <b>&lt;0.001</b> |
| <b>Race/Ethnicity</b>     |           |                         |           |                         |           |                         |                  |
| Non-Hispanic White        | 2171      | <b>56.5</b> (52.3-60.6) | 2172      | <b>53.0</b> (49.8-56.2) | 1728      | <b>31.9</b> (29.0-35.0) | <b>&lt;0.001</b> |
| Non-Hispanic Black        | 2624      | <b>55.5</b> (51.1-59.7) | 1894      | <b>55.6</b> (52.3-58.8) | 1750      | <b>41.7</b> (37.9-45.5) | <b>&lt;0.001</b> |
| Mexican American          | 2234      | <b>57.8</b> (52.6-62.8) | 1902      | <b>54.0</b> (50.8-57.1) | 1377      | <b>40.4</b> (37.2-43.6) | <b>&lt;0.001</b> |
| Hispanic                  | 278       | <b>71.0</b> (62.4-78.3) | 585       | <b>52.4</b> (47.6-57.2) | 701       | <b>43.9</b> (39.9-47.9) | <b>&lt;0.001</b> |
| Non-Hispanic Asian        | 0         |                         | 0         |                         | 435       | <b>41.8</b> (37.2-46.5) |                  |
| Other-Multiracial         | 282       | <b>56.1</b> (46.0-65.7) | 387       | <b>50.3</b> (43.7-56.9) | 424       | <b>34.3</b> (29.1-40.0) | <b>&lt;0.001</b> |

| <b>Education Level (Age≥6)</b>           |      |                         |      |                         |      |                         |                  |
|------------------------------------------|------|-------------------------|------|-------------------------|------|-------------------------|------------------|
| ≤Elementary School                       | 2472 | <b>54.3</b> (50.8-57.7) | 2611 | <b>41.8</b> (39.1-44.6) | 2688 | <b>38.6</b> (35.9-41.4) | <b>&lt;0.001</b> |
| Middle School                            | 1928 | <b>66.5</b> (61.7-70.9) | 1311 | <b>47.8</b> (42.6-53.0) | 1143 | <b>21.3</b> (17.8-25.3) | <b>&lt;0.001</b> |
| ≥ High School                            | 2010 | <b>54.2</b> (48.5-59.9) | 1549 | <b>68.7</b> (64.5-72.6) | 1173 | <b>21.8</b> (18.5-25.6) | <b>&lt;0.001</b> |
| <b>Insurance Status</b>                  |      |                         |      |                         |      |                         |                  |
| Insured                                  | 6454 | <b>58.1</b> (54.6-61.5) | 6202 | <b>53.3</b> (51.1-55.4) | 5998 | <b>36.1</b> (33.8-38.5) | <b>&lt;0.001</b> |
| Uninsured                                | 1032 | <b>51.0</b> (45.2-56.7) | 720  | <b>53.4</b> (49.2-57.5) | 409  | <b>32.8</b> (26.7-39.6) | <b>&lt;0.001</b> |
| <b>Household Size</b>                    |      |                         |      |                         |      |                         |                  |
| 1-2                                      | 419  | <b>53.1</b> (46.1-60.0) | 343  | <b>58.1</b> (49.7-66.0) | 245  | <b>38.4</b> (29.8-47.7) | <b>0.020</b>     |
| 3-5                                      | 5112 | <b>58.8</b> (55.5-62.1) | 4723 | <b>53.4</b> (51.0-55.8) | 4237 | <b>35.7</b> (33.1-38.3) | <b>&lt;0.001</b> |
| 6+                                       | 2058 | <b>52.3</b> (46.2-58.3) | 1874 | <b>51.9</b> (49.0-54.7) | 1933 | <b>36.3</b> (32.8-39.9) | <b>&lt;0.001</b> |
| <b>Family poverty income ratio (PIR)</b> |      |                         |      |                         |      |                         |                  |
| <1                                       | 2258 | <b>52.9</b> (48.4-57.4) | 2042 | <b>51.3</b> (47.3-55.3) | 2041 | <b>38.4</b> (36.0-40.9) | <b>&lt;0.001</b> |
| ≥1                                       | 4842 | <b>58.8</b> (55.1-62.4) | 4528 | <b>53.7</b> (51.1-56.3) | 3938 | <b>34.9</b> (32.3-37.6) | <b>&lt;0.001</b> |



**eTable 4: Prevalence of complete hepatitis B vaccine-induced immunity by serology test in fully vaccinated foreign-born children and adolescents age 2-18 years (survey years: 1999-2016)**

|                           | 1999-2004 |                         | 2005-2010 |                         | 2011-2016 |                         | Trends Analysis |
|---------------------------|-----------|-------------------------|-----------|-------------------------|-----------|-------------------------|-----------------|
| Demographic Variables     | n         | Adjusted % (95% CI)     | n         | Adjusted % (95% CI)     | n         | Adjusted % (95% CI)     | P-value         |
| <b>Overall</b>            | 874       | <b>63.4</b> (58.2-68.4) | 648       | <b>69.5</b> (65.1-73.6) | 528       | <b>62.6</b> (57.3-67.7) | 0.877           |
| <b>Sex</b>                |           |                         |           |                         |           |                         |                 |
| Male                      | 469       | <b>59.9</b> (54.3-65.2) | 321       | <b>64.9</b> (56.9-72.2) | 259       | <b>60.4</b> (54.8-65.7) | 0.857           |
| Female                    | 405       | <b>67.2</b> (60.4-73.2) | 327       | <b>74.2</b> (69.4-78.4) | 269       | <b>65.0</b> (57.4-71.9) | 0.695           |
| <b>Age groups (years)</b> |           |                         |           |                         |           |                         |                 |
| 2-5                       | 41        | <b>78.4</b> (59.0-90.1) | 42        | <b>54.9</b> (37.0-71.5) | 45        | <b>77.5</b> (60.6-88.5) | 0.937           |
| 6-10                      | 140       | <b>76.8</b> (67.9-83.9) | 152       | <b>68.1</b> (60.1-75.2) | 120       | <b>63.7</b> (52.7-73.4) | <b>0.047</b>    |
| 11-13                     | 175       | <b>67.8</b> (54.7-78.9) | 135       | <b>70.2</b> (59.1-79.4) | 103       | <b>65.3</b> (56.2-73.3) | 0.757           |
| 14-18                     | 518       | <b>52.6</b> (45.3-59.8) | 319       | <b>72.4</b> (65.3-78.6) | 260       | <b>58.7</b> (49.8-67.0) | 0.272           |
| <b>Race/Ethnicity</b>     |           |                         |           |                         |           |                         |                 |
| Non-Hispanic White        | 64        | <b>69.7</b> (56.0-80.6) | 61        | <b>70.7</b> (58.9-80.2) | 22        | <b>69.3</b> (42.6-87.2) | 0.996           |
| Non-Hispanic Black        | 101       | <b>51.4</b> (41.1-61.7) | 53        | <b>51.7</b> (38.6-64.7) | 56        | <b>73.7</b> (60.1-83.8) | <b>0.013</b>    |
| Mexican American          | 590       | <b>60.1</b> (53.0-66.8) | 363       | <b>68.5</b> (62.5-73.9) | 157       | <b>66.9</b> (59.5-73.4) | 0.159           |
| Hispanic                  | 78        | <b>70.3</b> (59.7-79.1) | 115       | <b>71.3</b> (59.0-81.1) | 101       | <b>55.0</b> (42.1-67.3) | 0.072           |
| Non-Hispanic Asian        | 0         |                         | 0         |                         | 173       | <b>56.6</b> (47.9-64.9) |                 |
| Other-Multiracial         | 41        | <b>56.7</b> (37.4-74.2) | 56        | <b>73.6</b> (51.5-88.0) | 19        | <b>61.0</b> (28.6-85.9) | 0.440           |

| <b>Education Level (Age ≥6)</b>          |     |                         |     |                         |     |                         |       |
|------------------------------------------|-----|-------------------------|-----|-------------------------|-----|-------------------------|-------|
| ≤Elementary School                       | 190 | <b>72.5</b> (63.7-79.8) | 215 | <b>69.3</b> (61.3-76.3) | 160 | <b>63.6</b> (55.2-71.3) | 0.141 |
| Middle School                            | 307 | <b>61.5</b> (52.7-69.6) | 175 | <b>68.7</b> (59.2-76.8) | 144 | <b>57.8</b> (47.8-67.3) | 0.564 |
| ≥ High School                            | 335 | <b>53.3</b> (42.5-63.8) | 216 | <b>74.2</b> (66.3-80.8) | 179 | <b>62.5</b> (53.1-71.0) | 0.172 |
| <b>Insurance Status</b>                  |     |                         |     |                         |     |                         |       |
| Insured                                  | 403 | <b>67.0</b> (60.2-73.2) | 335 | <b>66.6</b> (60.1-72.6) | 360 | <b>62.3</b> (55.6-68.6) | 0.317 |
| Uninsured                                | 463 | <b>57.8</b> (50.9-64.4) | 308 | <b>74.5</b> (67.7-80.3) | 167 | <b>63.6</b> (54.9-71.5) | 0.201 |
| <b>Household Size</b>                    |     |                         |     |                         |     |                         |       |
| 1-2                                      | 24  | <b>51.1</b> (24.9-76.7) | 22  | <b>91.3</b> (74.5-97.4) | 11  | <b>84.5</b> (38.0-98.0) | 0.170 |
| 3-5                                      | 460 | <b>63.1</b> (56.2-69.5) | 366 | <b>67.2</b> (61.2-72.7) | 361 | <b>62.9</b> (56.5-68.9) | 0.964 |
| 6+                                       | 390 | <b>65.0</b> (56.5-72.6) | 260 | <b>71.5</b> (62.9-78.7) | 156 | <b>59.6</b> (48.1-70.2) | 0.514 |
| <b>Family poverty income ratio (PIR)</b> |     |                         |     |                         |     |                         |       |
| <1                                       | 392 | <b>69.9</b> (63.1-75.9) | 295 | <b>76.2</b> (68.4-82.6) | 191 | <b>63.2</b> (56.2-69.7) | 0.199 |
| ≥1                                       | 390 | <b>60.2</b> (51.8-67.9) | 289 | <b>66.0</b> (60.0-71.6) | 269 | <b>63.1</b> (55.3-70.2) | 0.598 |

**eTable 5: Prevalence of hepatitis B core antibody in U.S.-born children and adolescents age 2-18 years (survey years 1999-2016)**

|                           | <b>1999-2004</b>               | <b>2005-2010</b>               | <b>2011-2016</b>               | <b>Trends Analysis</b> |
|---------------------------|--------------------------------|--------------------------------|--------------------------------|------------------------|
| <b>Age groups (years)</b> | <b>Adjusted %<br/>(95% CI)</b> | <b>Adjusted %<br/>(95% CI)</b> | <b>Adjusted %<br/>(95% CI)</b> | <b><i>P</i>-value</b>  |
| <b>Overall (n=17,531)</b> | <b>0.35 (0.14-0.90)</b>        | <b>0.53 (0.31-0.93)</b>        | <b>0.15 (0.09-0.27)</b>        | <b>0.190</b>           |
| <b>Age groups</b>         |                                |                                |                                |                        |
| <b>2-5</b>                | NA                             | NA                             | NA                             |                        |
| <b>6-10 (n=6201)</b>      | <b>0.55 (0.11-2.66)</b>        | <b>0.33 (0.08-1.42)</b>        | <b>0.15 (0.06-0.41)</b>        | <b>0.259</b>           |
| <b>11-13 (n=4323)</b>     | <b>0.21 (0.07-0.66)</b>        | <b>0.65 (0.24-1.74)</b>        | <b>0.18 (0.06-0.49)</b>        | <b>0.835</b>           |
| <b>14-18 (n=7007)</b>     | <b>0.26 (0.12-0.58)</b>        | <b>0.64 (0.37-1.12)</b>        | <b>0.14 (0.05-0.41)</b>        | <b>0.326</b>           |

**eTable 6. Predictors of hepatitis B immunity via serology tests in fully vaccinated U.S.-born children (2-18 years) from survey years 1999-2016**

| Variables                 | Univariable Analysis    |                  | Multivariable Analysis  |                  |
|---------------------------|-------------------------|------------------|-------------------------|------------------|
|                           | Odds Ratio<br>(95% CI)  | P-value          | Odds Ratio<br>(95% CI)  | P-value          |
| <b>Age groups (years)</b> |                         |                  |                         |                  |
| 2-5                       | 1 (Referent)            |                  | 1 (Referent)            |                  |
| 6-10                      | <b>0.51</b> (0.46-0.56) | <b>&lt;0.001</b> | <b>0.51</b> (0.46-0.56) | <b>&lt;0.001</b> |
| 11-13                     | <b>0.49</b> (0.43-0.56) | <b>&lt;0.001</b> | <b>0.49</b> (0.43-0.57) | <b>&lt;0.001</b> |
| 14-18                     | <b>0.55</b> (0.48-0.63) | <b>&lt;0.001</b> | <b>0.55</b> (0.49-0.63) | <b>&lt;0.001</b> |
| <b>Sex</b>                |                         |                  |                         |                  |
| Male                      | 1 (Referent)            |                  | 1 (Referent)            |                  |
| Female                    | <b>1.06</b> (0.98-1.15) | 0.133            | 1.06 (0.98-1.15)        | 0.131            |
| <b>Race</b>               |                         |                  |                         |                  |
| Non-Hispanic White        | 1 (Referent)            |                  | 1 (Referent)            |                  |
| Non-Hispanic Black        | <b>1.15</b> (1.02-1.31) | <b>0.032</b>     | <b>1.14</b> (1.00-1.30) | <b>0.045</b>     |
| Mexican American          | 1.09 (0.96-1.23)        | 0.193            | 1.05 (0.93-1.19)        | 0.424            |
| Hispanic                  | <b>1.30</b> (1.08-1.55) | <b>0.006</b>     | <b>1.27</b> (1.05-1.54) | <b>0.015</b>     |
| Non-Hispanic Asian        | <b>0.79</b> (0.65-0.97) | <b>0.022</b>     | <b>0.79</b> (0.65-0.96) | <b>0.017</b>     |
| Other-Multiracial         | 0.99 (0.83-1.18)        | 0.791            | 0.95 (0.79-1.14)        | 0.566            |

**eTable 7: Age specific prevalence of complete vaccination through participant self-reported vaccination history, by birth year from 1988-2007**

|                    | Birth year                 |                            |                            |                            |                            |                            |                            |                            |                            |                            | <i>P</i> -value  |
|--------------------|----------------------------|----------------------------|----------------------------|----------------------------|----------------------------|----------------------------|----------------------------|----------------------------|----------------------------|----------------------------|------------------|
|                    | 88-89                      | 90-91                      | 92-93                      | 94-95                      | 96-97                      | 98-99                      | 00-01                      | 02-03                      | 04-05                      | 06-07                      |                  |
| Age groups (years) |                            |                            |                            |                            |                            |                            |                            |                            |                            |                            |                  |
| <b>2-5</b>         |                            |                            |                            | <b>79.6</b><br>(55.9-92.3) | <b>84.9</b><br>(78.0-90.0) | <b>85.3</b><br>(81.0-88.8) | <b>84.9</b><br>(81.0-88.1) | <b>86.2</b><br>(81.9-89.7) | <b>89.4</b><br>(85.3-92.5) | <b>88.9</b><br>(84.6-92.0) | <b>0.031</b>     |
| <b>6-10</b>        |                            | <b>58.3</b><br>(50.6-65.6) | <b>74.8</b><br>(69.6-79.3) | <b>85.8</b><br>(82.2-88.8) | <b>92.6</b><br>(89.1-95.1) | <b>91.6</b><br>(87.9-94.3) | <b>92.2</b><br>(89.3-94.3) | <b>89.2</b><br>(84.5-92.6) | <b>91.9</b><br>(88.9-94.1) | <b>91.4</b><br>(88.0-93.8) | <b>&lt;0.001</b> |
| <b>11-13</b>       | <b>65.4</b><br>(59.1-71.2) | <b>70.6</b><br>(65.9-74.8) | <b>82.8</b><br>(77.6-87.0) | <b>91.5</b><br>(86.4-94.8) | <b>93.5</b><br>(90.8-95.4) | <b>92.8</b><br>(89.6-95.1) | <b>88.3</b><br>(82.9-92.2) | <b>84.9</b><br>(79.2-89.2) | <b>87.2</b><br>(83.3-90.3) |                            | <b>&lt;0.001</b> |
| <b>14-18</b>       | <b>80.0</b><br>(75.6-83.8) | <b>84.0</b><br>(80.3-87.1) | <b>86.9</b><br>(83.0-90.1) | <b>87.4</b><br>(84.3-90.0) | <b>88.7</b><br>(84.7-91.8) | <b>80.2</b><br>(75.5-84.2) | <b>85.3</b><br>(78.6-90.1) | <b>89.5</b><br>(78.8-95.2) |                            |                            | 0.283            |

**eTable 8. Predictors of hepatitis B vaccination through reported vaccine history in U.S.-born children and adolescents (2-18 years) from survey years 1999-2016**

| Variables                                | Univariable Analysis    |                  | Multivariable Analysis  |                  |
|------------------------------------------|-------------------------|------------------|-------------------------|------------------|
|                                          | Odds Ratio<br>(95% CI)  | P-value          | Odds Ratio<br>(95% CI)  | P-value          |
| <b>Age groups (years)</b>                |                         |                  |                         |                  |
| 2-5                                      | 1 (Referent)            |                  | 1 (Referent)            |                  |
| 6-10                                     | <b>1.16</b> (1.00-1.34) | <b>0.043</b>     | <b>1.18</b> (1.01-1.37) | <b>0.037</b>     |
| 11-13                                    | <b>0.78</b> (0.66-0.92) | <b>0.004</b>     | <b>0.77</b> (0.64-0.91) | <b>0.003</b>     |
| 14-18                                    | <b>0.61</b> (0.52-0.71) | <b>&lt;0.001</b> | <b>0.63</b> (0.54-0.74) | <b>&lt;0.001</b> |
| <b>Race</b>                              |                         |                  |                         |                  |
| Non-Hispanic White                       | 1 (Referent)            |                  | 1 (Referent)            |                  |
| Non-Hispanic Black                       | 0.88 (0.74-1.04)        | 0.136            | 0.90 (0.75-1.08)        | 0.272            |
| Mexican American                         | <b>1.23</b> (1.01-1.50) | <b>0.035</b>     | <b>1.31</b> (1.08-1.58) | <b>0.006</b>     |
| Hispanic                                 | <b>1.38</b> (1.07-1.79) | <b>0.014</b>     | <b>1.38</b> (1.07-1.79) | <b>0.015</b>     |
| Non-Hispanic Asian                       | <b>1.46</b> (1.00-2.11) | <b>0.048</b>     | 1.34 (0.92-1.95)        | 0.129            |
| Other-Multiracial                        | 1.19 (0.88-1.62)        | 0.257            | 1.18 (0.89-1.57)        | 0.241            |
| <b>Insurance status</b>                  |                         |                  |                         |                  |
| Uninsured                                | 1 (Referent)            |                  | 1 (Referent)            |                  |
| Insured                                  | <b>1.97</b> (1.65-2.36) | <b>&lt;0.001</b> | <b>1.94</b> (1.63-2.29) | <b>&lt;0.001</b> |
| <b>Family poverty income ratio (PIR)</b> |                         |                  |                         |                  |
| <1                                       | 1 (Referent)            |                  | 1 (Referent)            |                  |
| ≥1                                       | <b>1.16</b> (1.03-1.32) | <b>0.017</b>     | <b>1.22</b> (1.07-1.38) | <b>0.003</b>     |

**eFigure 1. Timeline of hepatitis B vaccine recommendations by the Advisory Committee on Immunization Practices<sup>1-12</sup>**

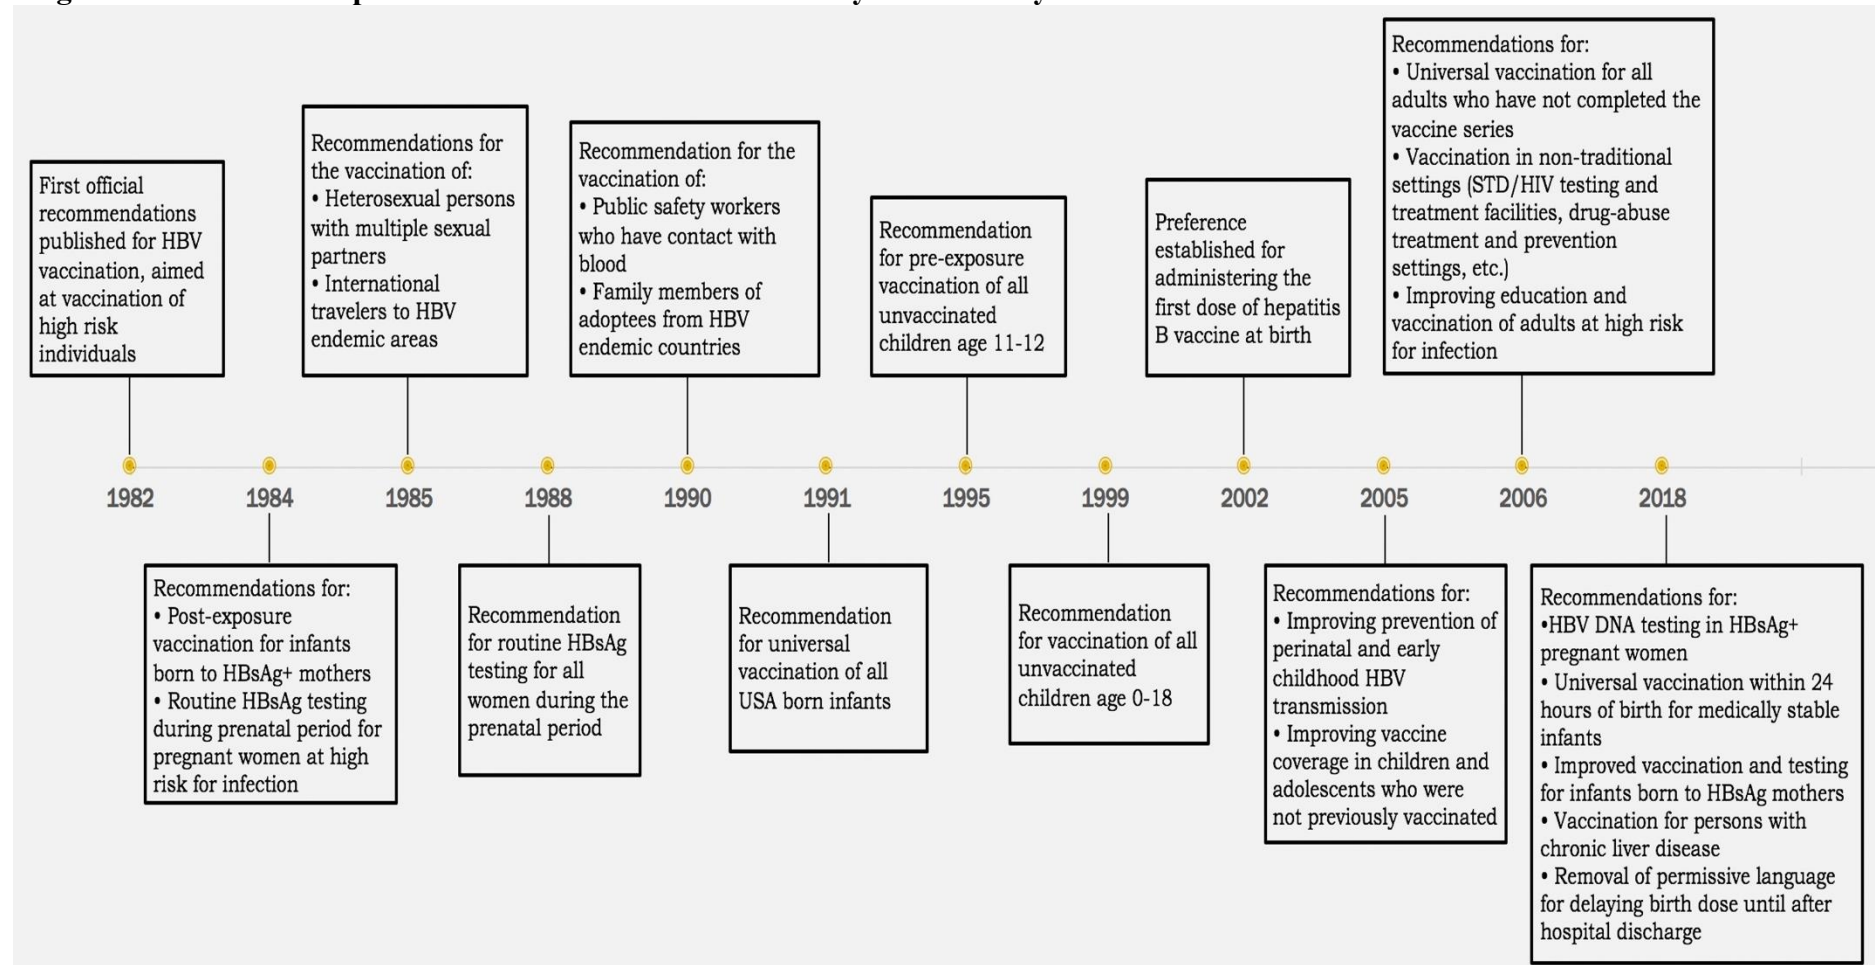

In 1991, the Advisory Committee on Immunization Practices (ACIP) recommended universal vaccination of infants for prevention of perinatal HBV transmission, as well as catch-up vaccinations for susceptible children and adult populations at high risk for infection. In 2005, ACIP further solidified this recommendation by specifying that all newborns who weigh >2,000 g (4.4 lbs) and are medically stable receive their first dose of hepatitis B vaccine before discharge.

eFigure 2. Timeline of hepatitis B vaccine availability in the United States<sup>13-21</sup>

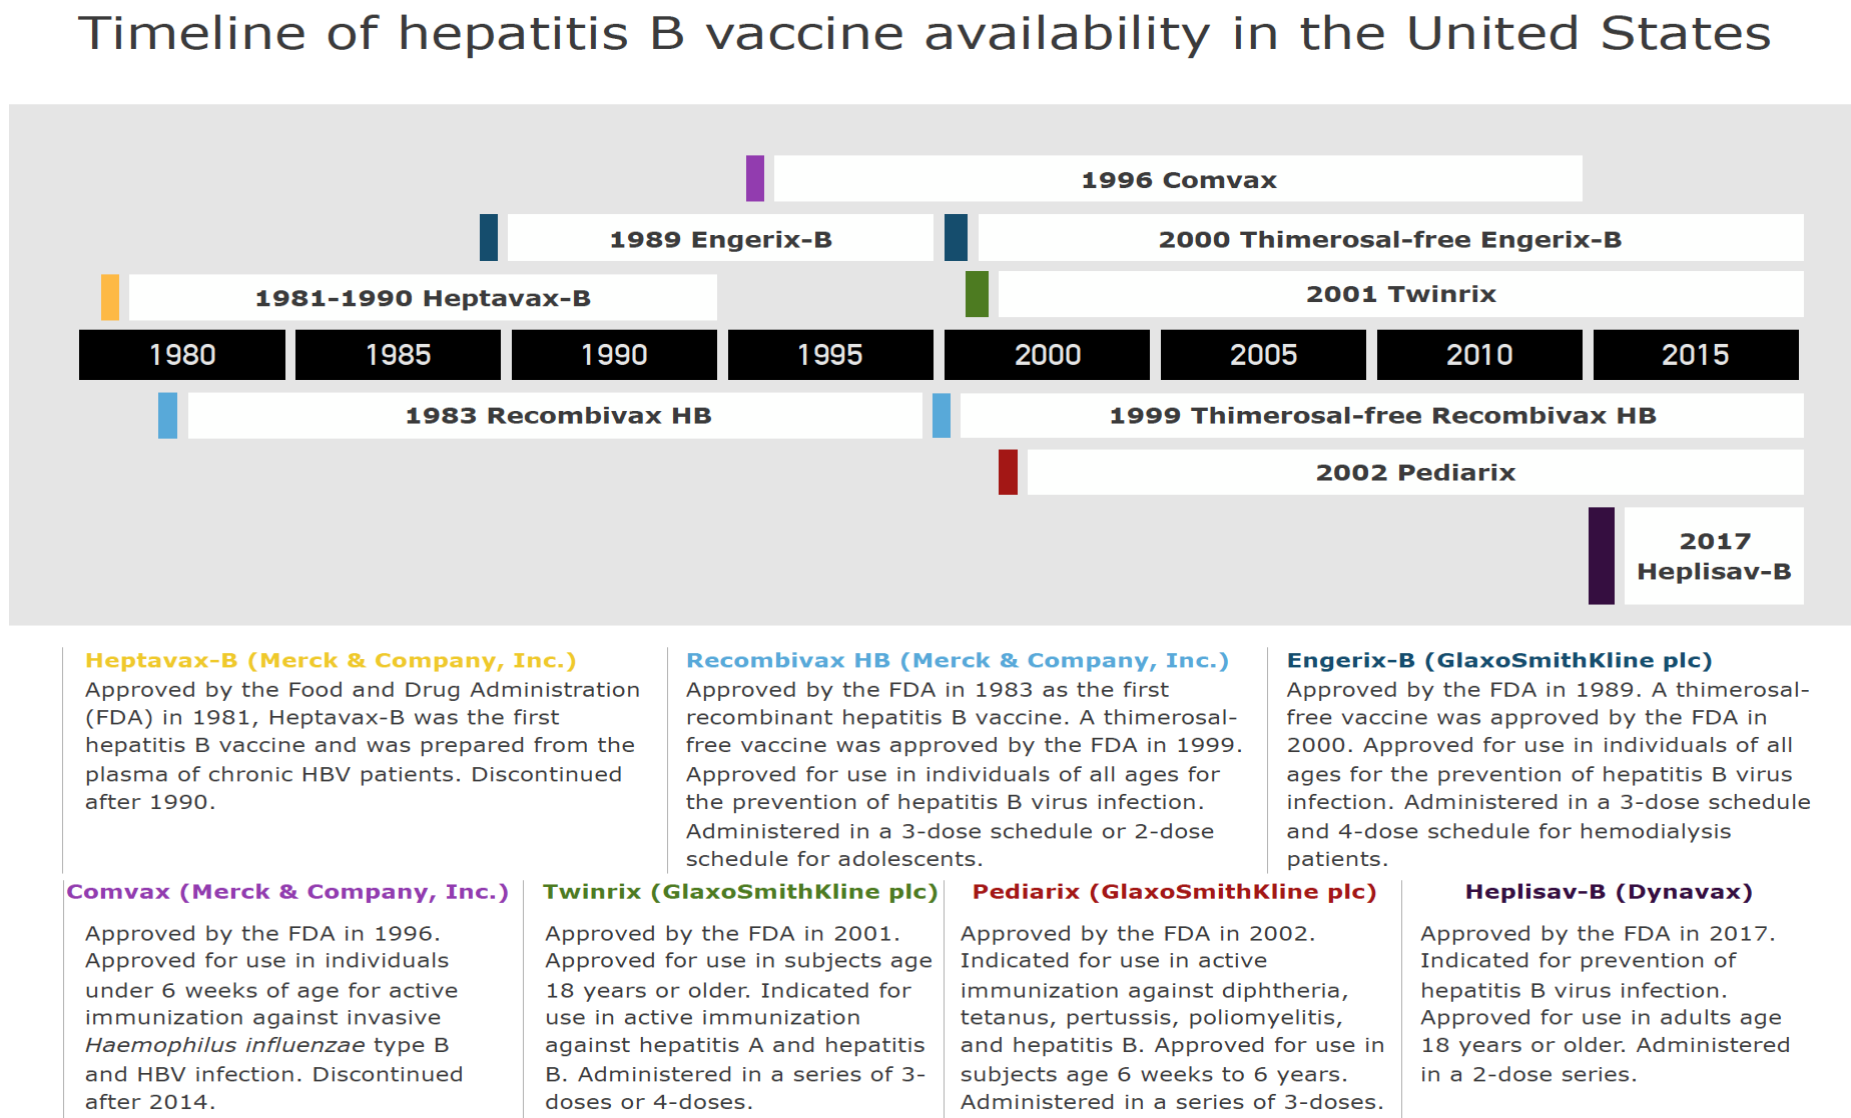



**eAppendix. Literature review on anamnestic response**

| Study                            | No. of patients | Birth cohort                               | Country            | Loss of immunity (%)                                                        | Booster vaccine and dose                                                | Age at booster dose (year) | Anamnestic response                |
|----------------------------------|-----------------|--------------------------------------------|--------------------|-----------------------------------------------------------------------------|-------------------------------------------------------------------------|----------------------------|------------------------------------|
| Lin 2003 <sup>22</sup>           | 200             | 1987                                       | Taiwan             | 71.1% at age 7, 37.4% at age 12                                             | Recombinant hepatitis B vaccines, 5 µg of Ricombivax [Merck] or 20 µg o | 7-12                       | 60% after one year                 |
| Boxall 2004 <sup>23</sup>        | 116             | 1986                                       | UK                 | 60% after 9 years follow-up                                                 | A dose, HB VAX II, Aventis Pasteur                                      | (Mean) 11.7-14.5           | 83.6%                              |
| Lu 2004 <sup>24</sup>            | 91              | 1988                                       | Taiwan             | 48.7% after 15 years follow-up                                              | A dose, 20 µg, recombinant DNA HB vaccine, Engerix-B                    | 15                         | 89%                                |
| Gabbuti 2007 <sup>25</sup>       | 20              | 1980<br>( <i>vaccinated in 1992</i> )      | Italy              | 8.8% after 11 years follow-up                                               | NA                                                                      | 23                         | 91.7%                              |
| Jafarzadeh 2006 <sup>26</sup>    | 94              | NA                                         | Iran               | 52.1% after 10 years follow-up                                              | NA                                                                      | 10-11                      | 95.8%                              |
| van der Sande 2007 <sup>27</sup> | 297             | 1986-1990                                  | Gambia             | 66.5% after 15 years follow-up                                              | A dose, Euvax®                                                          | 15                         | 96.8%                              |
| McMahon 2009 <sup>28</sup>       | 493             | 1981                                       | US<br>(Alaska)     | 40% after 22 years follow-up                                                | A dose, 10 mg, Recombivax HB (Merck)                                    | 22                         | 81% at 60 days, 41% after one year |
| Van Damme 2010 <sup>29</sup>     | 40              | 1986-1991<br>( <i>vaccinated in 2001</i> ) | Belgium, Australia | 79.5% in 2-dose group and 91.4% in the 3-dose group after 5 years follow-up | A dose, 10 µg, recombinant HBsAg, Engerix™-B                            | (Mean) 18.5                | 100%                               |

## **References**

1. CDC. Inactivated hepatitis B vaccine. MMWR 1982;31:317--8.
2. CDC. Postexposure prophylaxis of hepatitis B. MMWR 1984;33:285--90.
3. CDC. Recommendation of the Immunization Practices Advisory Committee (ACIP) Recommendations for Protection Against Viral Hepatitis. MMWR 1985;34:313-24,329-35.
4. CDC. Prevention of perinatal transmission of hepatitis B virus: prenatal screening of all pregnant women for hepatitis B surface antigen. MMWR 1988;37:341--6, 351.
5. CDC. Protection Against Viral Hepatitis Recommendations of the Immunization Practices Advisory Committee (ACIP). MMWR 1990;39(RR-2):1-26.
6. CDC. Hepatitis B virus: a comprehensive strategy for eliminating transmission in the United States through universal childhood vaccination. MMWR 1991;40(No. RR-13).
7. CDC. Update: recommendations to prevent hepatitis B virus transmission---United States. MMWR 1995;44:574--5.
8. CDC. Update: recommendations to prevent hepatitis B virus transmission---United States. MMWR 1999;48:33--4.
9. CDC. Notice to Readers: Recommended Childhood Immunization Schedule --- United States, 2002. MMWR 2002;51:31-3
10. Centers for Disease Control and Prevention. A comprehensive immunization strategy to eliminate transmission of hepatitis B virus infection in the United States: Recommendations of the Advisory Committee on Immunization Practices (ACIP); Part I: Immunization of Infants, Children, and Adolescents. MMWR 2005;54:1-3.
11. Centers for Disease Control and Prevention. A comprehensive immunization strategy to eliminate transmission of hepatitis B virus infection in the United States: Recommendations of the Advisory Committee on Immunization Practices (ACIP); Part II: Immunization of Adults. MMWR 2006;55:1-3.
12. Centers for Disease Control and Prevention. Prevention of Hepatitis B Virus Infection in the United States: Recommendations of the Advisory Committee on Immunization Practices. MMWR 2018; 67:1-2
13. Jr. SH. Vaccine for hepatitis B, judged highly effective, is approved by F.D.A. New York Times 1981 November 17.
14. Administration USFaD. Recombivax HB 1983 [Package Insert - Recombivax HB]. Available from: <https://www.fda.gov/downloads/BiologicsBloodVaccines/Vaccines/ApprovedProducts/UCM110114.pdf>.
15. Administration USFaD. ENGERIX-B 1989 [Package Insert - ENGERIX-B]. Available from: <https://www.fda.gov/downloads/BiologicsBloodVaccines/Vaccines/ApprovedProducts/UCM224503.pdf>.
16. Centers for Disease C, Prevention. Notice to Readers FDA Approval for Infants of a Haemophilus influenzae Type b Conjugate and Hepatitis B (Recombinant) Combined Vaccine. MMWR Morb Mrotal Wkly Rep 1997; 46(05):107-109.
17. Centers for Disease C, Prevention. Availability of hepatitis B vaccine that does not contain thimerosal as a preservative. MMWR Morb Mortal Wkly Rep 1999;48(35):780-2.
18. Centers for Disease C, Prevention. Update: expanded availability of thimerosal preservative-free hepatitis B vaccine. MMWR Morb Mortal Wkly Rep 2000;49(28):642, 51.

19. Administration USFaD. TWINRIX 2001 [Package Insert - TWINRIX]. Available from: <https://www.fda.gov/downloads/BiologicsBloodVaccines/Vaccines/ApprovedProducts/UCM110079.pdf>.
20. Administration USFaD. Pediarix 2002 [Package Insert - Pediarix]. Available from: <https://www.fda.gov/downloads/BiologicsBloodVaccines/Vaccines/ApprovedProducts/UCM241874.pdf>.
21. Administration USFaD. HEPLISAV-B 2017 [Package Insert - HEPLISAV-B]. Available from: <https://www.fda.gov/downloads/BiologicsBloodVaccines/Vaccines/ApprovedProducts/UCM584762.pdf>.
22. Lin YC, Chang MH, Ni YH, et al. Long-term immunogenicity and efficacy of universal hepatitis B virus vaccination in Taiwan. *J Infect Dis* 2003;187(1):134-8.
23. Boxall EH, J AS, El-Shuhkri N, et al. Long-term persistence of immunity to hepatitis B after vaccination during infancy in a country where endemicity is low. *J Infect Dis* 2004;190(7):1264-9.
24. Lu CY, Chiang BL, Chi WK, et al. Waning immunity to plasma-derived hepatitis B vaccine and the need for boosters 15 years after neonatal vaccination. *Hepatology* 2004;40(6):1415-20.
25. Gabbuti A, Romano L, Blanc P, et al. Long-term immunogenicity of hepatitis B vaccination in a cohort of Italian healthy adolescents. *Vaccine* 2007;25(16):3129-32.
26. Jafarzadeh A, Montazerifar SJ. Persistence of anti-HBs antibody and immunological memory in children vaccinated with hepatitis B vaccine at birth. *J Ayub Med Coll Abbottabad* 2006;18(4):4-9.
27. van der Sande MA, Waight PA, Mendy M, et al. Long-term protection against HBV chronic carriage of Gambian adolescents vaccinated in infancy and immune response in HBV booster trial in adolescence. *PLoS One* 2007;2(8):e753.
28. McMahon BJ, Dentinger CM, Bruden D, et al. Antibody levels and protection after hepatitis B vaccine: results of a 22-year follow-up study and response to a booster dose. *J Infect Dis* 2009;200(9):1390-6.
29. Van Damme P, Moiseeva A, Marichev I, et al. Five years follow-up following two or three doses of a hepatitis B vaccine in adolescents aged 11-15 years: a randomised controlled study. *BMC Infect Dis* 2010;10:357.
